# Supplementary material
Source: Royal Society of Chemistry journal article supplement (doi:10.1039/d6gc00241b)
Supplement: d6gc00241b2.pdf [file d6gc00241b2.pdf]

## Supporting information

### **A multi-enzyme cascade with internal cofactor cycling for the green conversion of inert n-alkanes to $\alpha,\omega$ -dicarboxylic acids**

Zhijun Kong,<sup>\*a</sup> Weihan Sun,<sup>a</sup> Wenjin Dong,<sup>a</sup> Su Song,<sup>a</sup> Li Ma,<sup>\*a</sup> Shengying Li<sup>\*a,b</sup> and Hui Chen<sup>\*a</sup>

<sup>a</sup> State Key Laboratory of Microbial Technology, Shandong University, Qingdao 266237, China

<sup>b</sup> Laboratory for Marine Biology and Biotechnology, Qingdao Marine Science and Technology Center,  
Qingdao 266237, China

\* Corresponding Author: Li Ma (maliqu@sdu.edu.cn)

Shengying Li (lishengying@sdu.edu.cn)

Hui Chen (Chen.Hui@sdu.edu.cn)

**ORCID:** Li Ma: 0000-0003-1601-7125

Shengying Li: 0000-0002-5244-870X

Hui Chen: 0000-0002-8944-0090

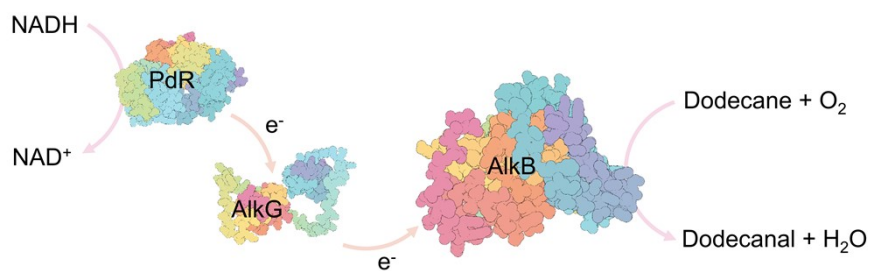

**Scheme S1** The terminal C-H bond hydroxylation of dodecane catalyzed by AlkB. AlkB is a non-heme diiron monooxygenase. During the catalytic cycle, the diiron center activates molecular oxygen (O<sub>2</sub>). One oxygen atom is inserted into the terminal C-H bond of the alkane substrate. Concurrently, the second oxygen atom acts as the terminal acceptor for the hydrogen atoms—specifically, the hydride equivalent derived from NADH (transferred via the PdR-AlkG electron cascade) and a proton—to ultimately generate a molecule of water (H<sub>2</sub>O). Thus, the hydrogen atoms removed during this oxidation process are transferred to form H<sub>2</sub>O.<sup>1,2</sup>

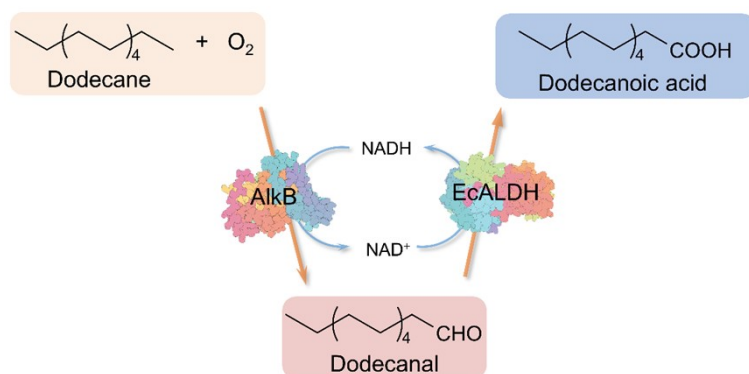

**Scheme S2** The scheme of multi-enzymatic conversion from dodecane to dodecanoic acid coupled with NADH regeneration.

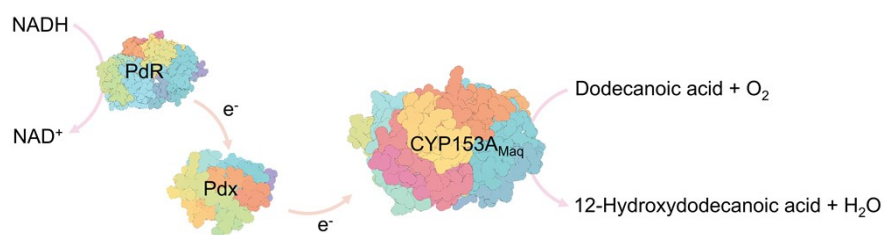

**Scheme S3**  $\omega$ -hydroxylation of 12-hydroxydodecanoic acid catalyzed by CYP153A<sub>Maq</sub>. CYP153A<sub>Maq</sub> is a cytochrome P450 monooxygenase. In its catalytic cycle, the heme iron center activates O<sub>2</sub>. One oxygen atom is incorporated into the  $\omega$ -position of dodecanoic acid to form the hydroxyl group. The second oxygen atom serves as the terminal acceptor for the hydrogen atoms (the electron/hydride equivalents donated by NADH via the PdR-Pdx chain, along with a proton), yielding a molecule of H<sub>2</sub>O.<sup>3</sup>

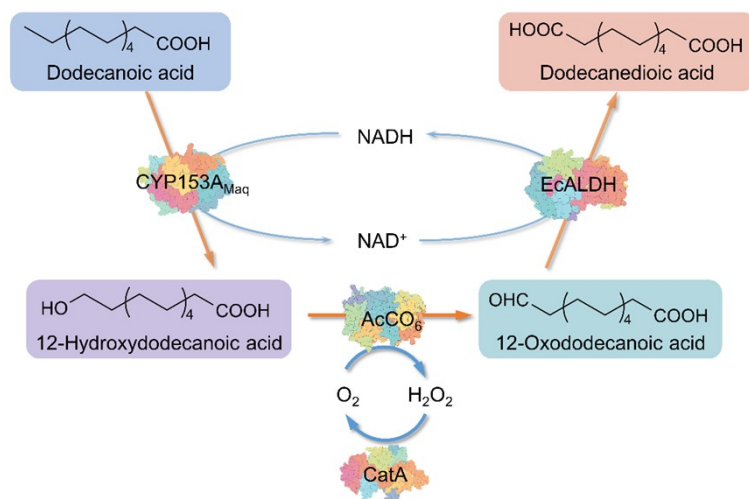

**Scheme S4** A multi-enzyme cascade conversion scheme for the conversion of dodecanoic acid to dodecanedioic acid ingeniously integrates an internal NADH cycle regeneration system.

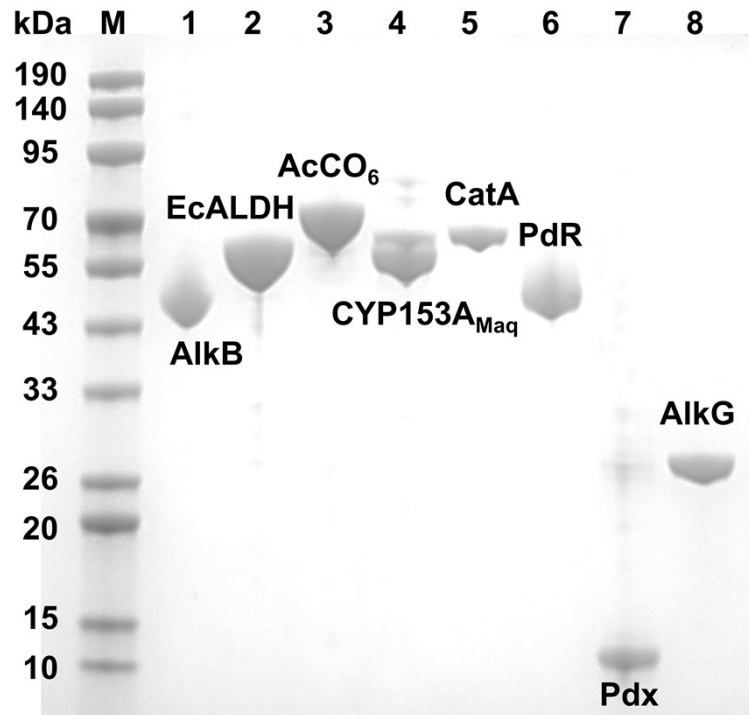

**Fig. S1** SDS-PAGE analysis of purified enzymes used in this study. (a) Lane M: marker; Lane 1: AlkB (46.9 kDa); Lane 2: EcALDH (54.2 kDa); Lane 3: AcCO<sub>6</sub> (60.9 kDa); Lane 4: CYP153A<sub>Maq</sub> (55.1 kDa); Lane 5: CatA (55.9 kDa); Lane 6: PdR (46.6 kDa); Lane 7: Pdx (12.6 kDa); Lane 8: AlkG (20.1 kDa).

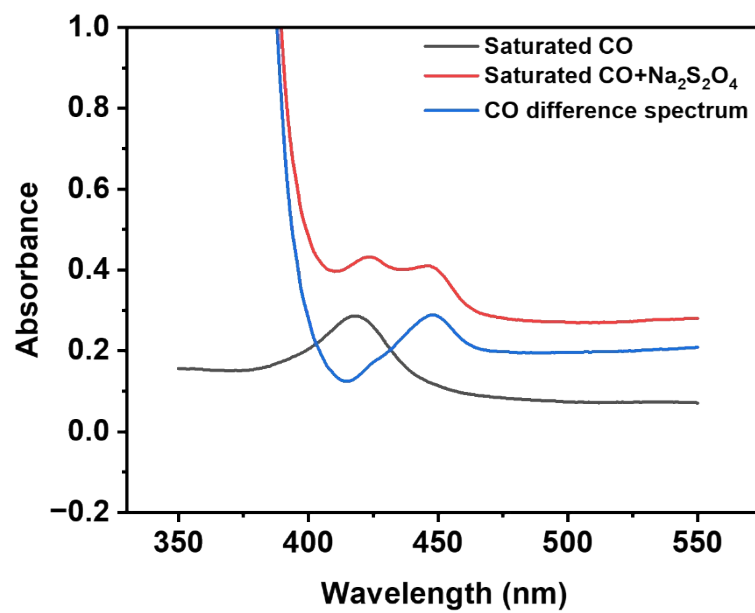

**Fig. S2** CO difference spectra of purified CYP153A<sub>Maq</sub>. Black curve: The CO staturated CYP153A<sub>Maq</sub> sample; Red curve: Added Na<sub>2</sub>S<sub>2</sub>O<sub>4</sub> to the CO staturated CYP153A<sub>Maq</sub> sample; Blue curve: CO difference spectra.

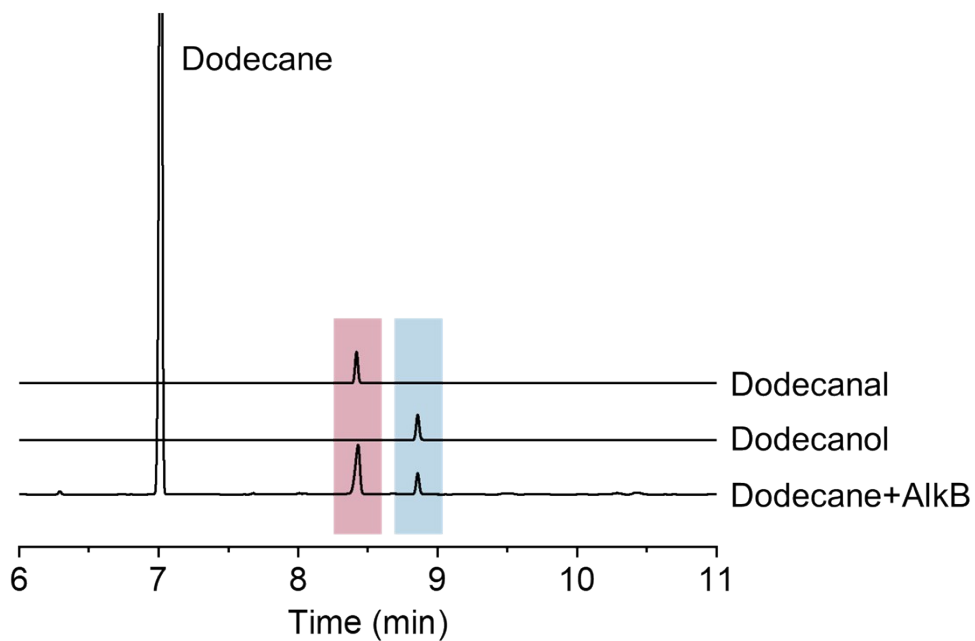

**Fig. S3** GC analysis of the formation of dodecanol and dodecanal catalyzed by AlkB. The reactions were performed in a 7 mL sealed vial with magnetic string at room temperature. The 500  $\mu$ L reaction mixture contained 100 mM KPi buffer (pH=8.0), 10  $\mu$ M (0.06 U/mL) AlkB, 30  $\mu$ M AlkG, 60  $\mu$ M PdR (molar ratio of AlkB: AlkG: PdR=1:3:6), 4 mM NADH and 0.75% (v/v) dodecane as substrate. After the reactions were completed, the reaction mixtures were extracted with MTBE containing 0.5 mM n-eicosane as an internal standard.

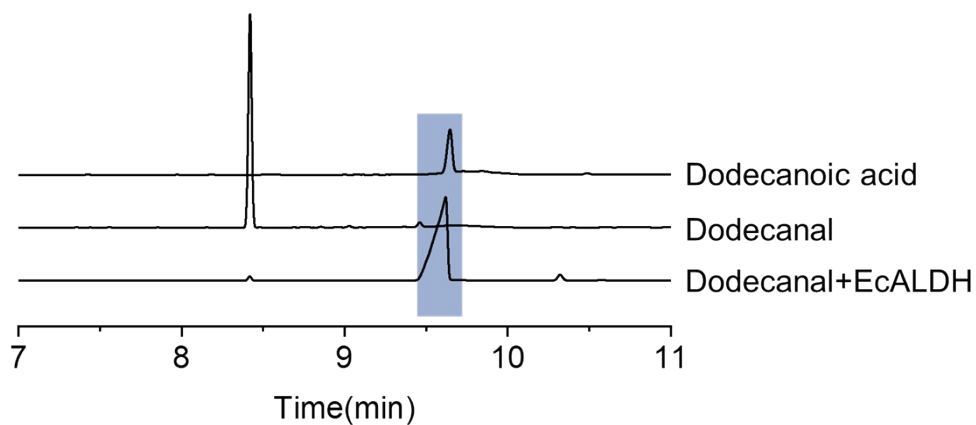

**Fig. S4** GC analysis of the formation of dodecanoic acid catalyzed by EcALDH. The reactions were performed in a 7 mL sealed vial with magnetic string at room temperature. The 500  $\mu$ L reaction mixture contained 100 mM KPi buffer (pH=8.0), 10  $\mu$ M (0.20 U/mL) EcALDH, 4 mM  $\text{NAD}^+$  and 2 mM dodecanal. After the reactions were completed, the reaction mixtures were extracted with MTBE containing 0.5 mM n-eicosane as an internal standard.

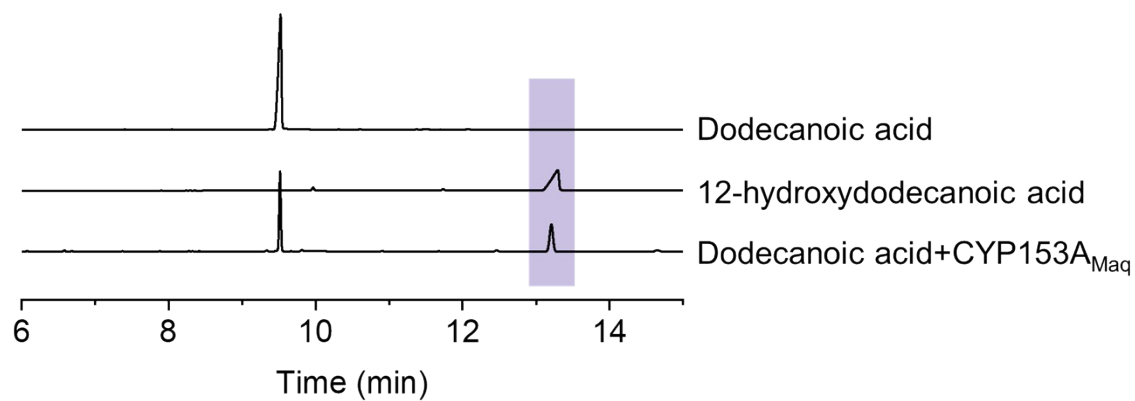

**Fig. S5** GC analysis of the formation of 12-hydroxydodecanoic acid catalyzed by CYP153A<sub>Maq</sub>. The reactions were performed in a 7 mL sealed vial with magnetic string at room temperature. The 500  $\mu$ L reaction mixture contained 100 mM KPi buffer (pH=8.0), 30 mM MgCl<sub>2</sub>, 10  $\mu$ M (0.10 U/mL) CYP153A<sub>Maq</sub>, 10  $\mu$ M PdR, 100  $\mu$ M Pdx (molar ratio of CYP153A<sub>Maq</sub>: PdR: Pdx=1:1:10), 2 mM NADH and 2 mM dodecanoic acid. After the reaction was completed, the reaction mixture was first acidified with 10% (v/v) hydrochloric acid. Then, MTBE containing 0.5 mM n-eicosane as an internal standard was added for extraction.

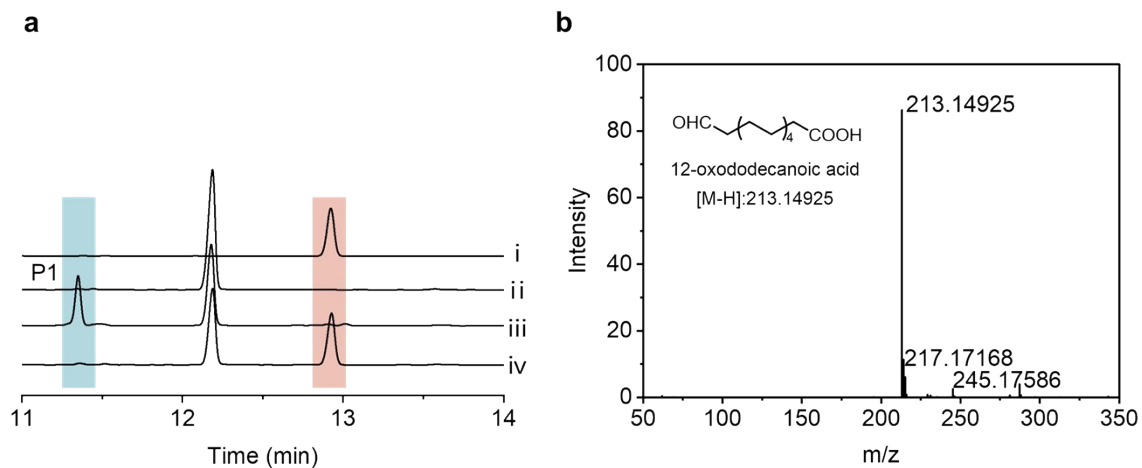

**Fig. S6 a** GC analysis of the formation of dodecanedioic acid catalyzed by  $\text{AcCO}_6$  and EcALDH. (i) GC analysis of dodecanedioic acid standard. (ii) GC analysis of the negative control (without  $\text{AcCO}_6$  and EcALDH) using 12-hydroxydodecanoic acid as the substrate. (iii) GC analysis of the conversion from 12-hydroxydodecanoic acid to 12-oxododecanoic acid catalyzed by  $\text{AcCO}_6$ . (iv) GC analysis of the conversion from 12-hydroxydodecanoic acid to dodecanedioic acid catalyzed by  $\text{AcCO}_6$  and EcALDH.  $\text{AcCO}_6$ -catalyzed reactions were performed in a 7 mL sealed vial with magnetic string at room temperature. The 500  $\mu\text{L}$  reaction mixture contained 100 mM KPi buffer (pH=8.0), 10  $\mu\text{M}$  (0.003 U/mL)  $\text{AcCO}_6$  and 2 mM 12-hydroxydodecanoic acid. Since 12-oxododecanoic acid standards were unavailable, we indirectly verified the aldehyde dehydrogenase activity of EcALDH by adding 10  $\mu\text{M}$  (0.17 U/mL) EcALDH and 2 mM  $\text{NAD}^+$  to the reaction mixture described above, thereby converting the intermediate 12-oxododecanoic acid into dodecanedioic acid. After the reactions were completed, the reaction mixtures were first acidified with 10% (v/v) hydrochloric acid. Then, MTBE containing 0.5 mM n-eicosane as an internal standard was added for extraction. The derivatization method reported by Slaughter et al.<sup>4</sup> was used for sample processing. **b** When  $\text{AcCO}_6$  catalyzed the conversion of 12-hydroxydodecanoic acid, a new product peak (labeled P1) was observed (**Figure S6a**). LC-MS analysis confirmed this product to be 12-oxododecanoic acid.

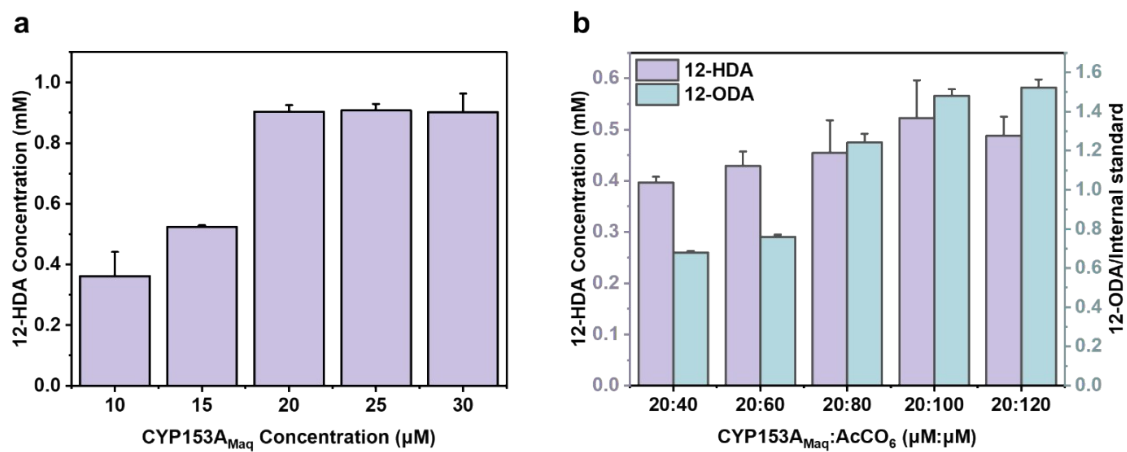

**Fig. S7** Optimization of the enzyme ratio for CYP153A<sub>Maq</sub> to AcCO<sub>6</sub>. **a** The enzyme concentration of CYP153A<sub>Maq</sub> was optimized. With the Mg<sup>2+</sup> concentration fixed at 30 mM, CYP153A<sub>Maq</sub> was added at varying concentrations. **b** The enzyme ratio of CYP153A<sub>Maq</sub> to AcCO<sub>6</sub> was optimized. With CYP153A<sub>Maq</sub> concentration fixed at 20 μM (0.19 U/mL), AcCO<sub>6</sub> was added at varying concentrations.

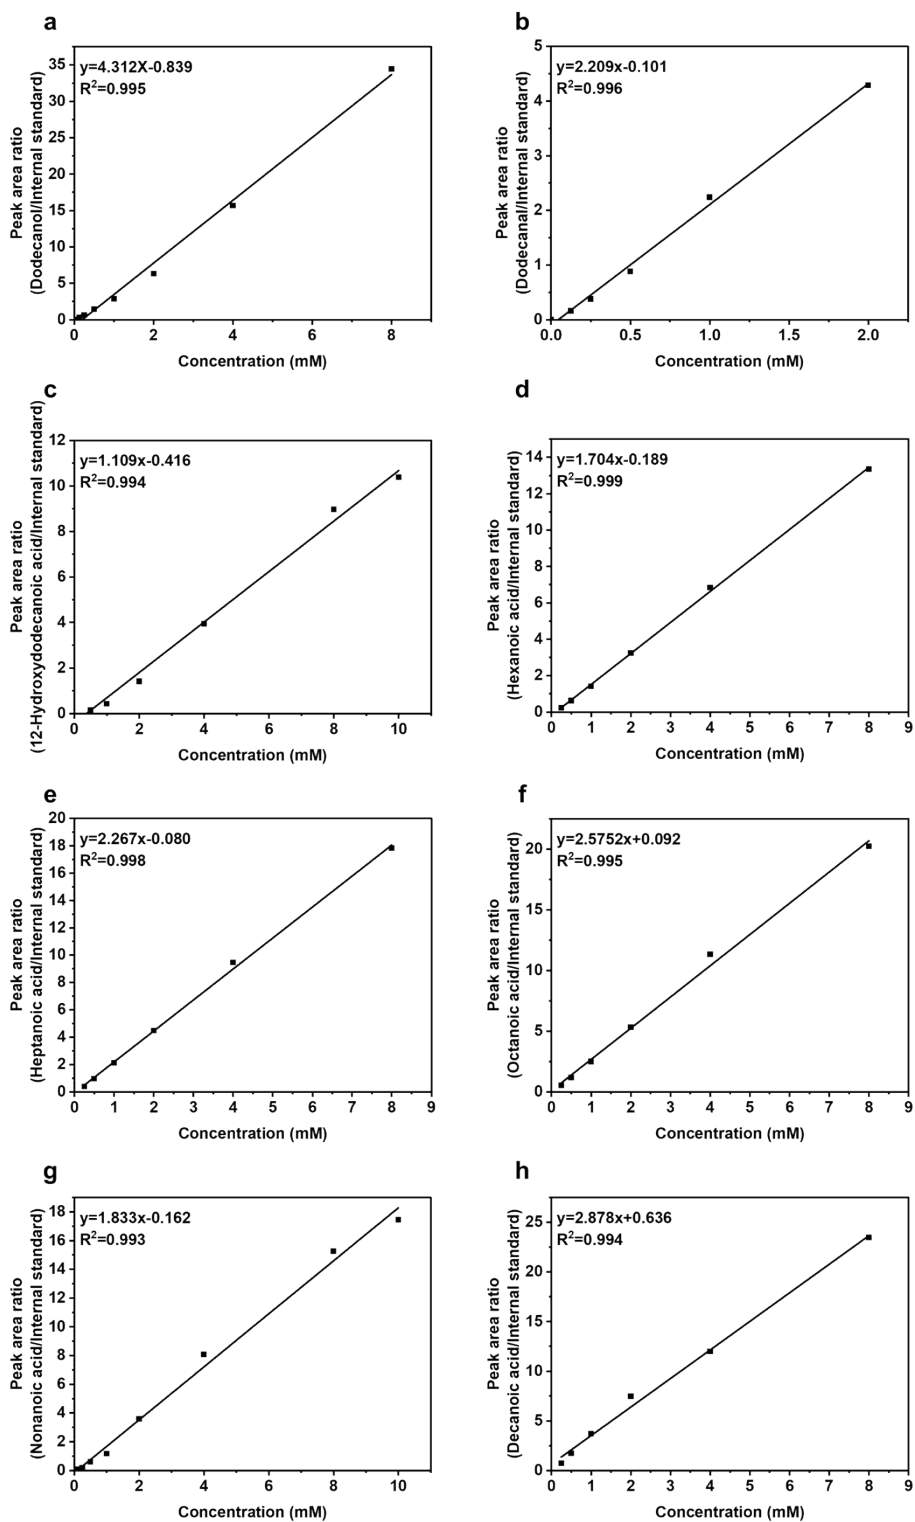

**Fig. S8** GC calibration curve for the quantification analysis of dodecanol (a), dodecanol (b), 12-hydroxydodecanoic acid (c), hexanoic acid (d), heptanoic acid (e), octanoic acid (f), nonanoic acid (g) and decanoic acid (h).

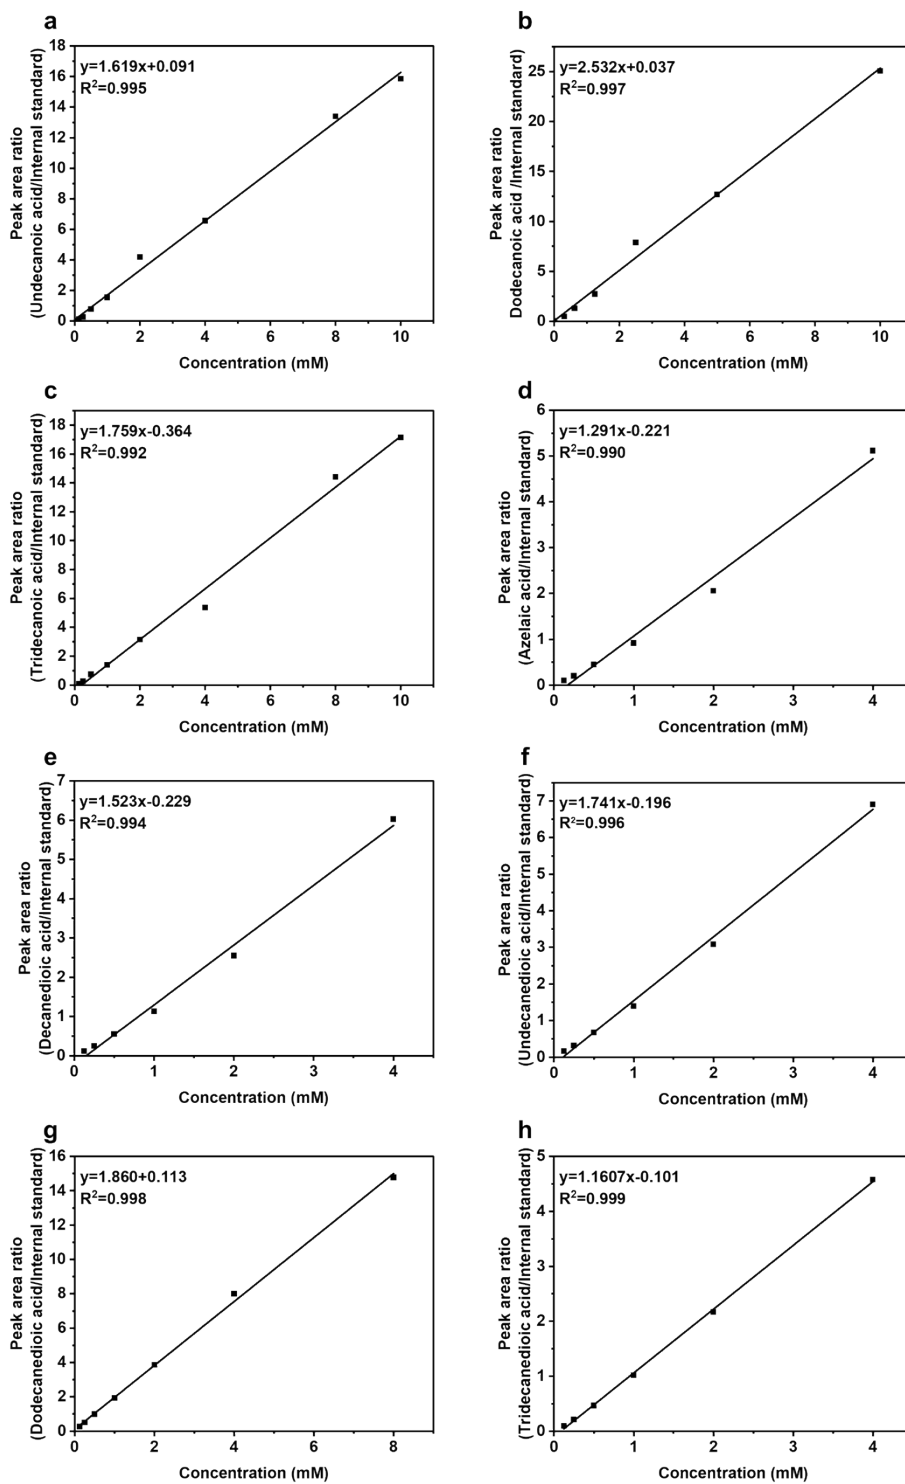

**Fig. S9** GC calibration curve for the quantification analysis of undecanoic acid (a), dodecanoic acid (b), tridecanoic acid (c), azelaic acid (d), decanedioic acid (e), undecanedioic acid (f), dodecanedioic acid (g) and tridecanedioic acid (h).

**Table S1.** Comparison of key performance and sustainability metrics of the proposed multi-enzyme cascade system with established chemical oxidation and whole-cell fermentation methods.

| Metrics                       | Typical process                                    | Substrate     | Reaction conditions                       | Catalyst                                    | Oxidizing agent  | Cofactor                                                   | Atom economy                               | Regional selectivity               | Ref. |
|-------------------------------|----------------------------------------------------|---------------|-------------------------------------------|---------------------------------------------|------------------|------------------------------------------------------------|--------------------------------------------|------------------------------------|------|
| <b>This Work</b>              | Multi-enzyme cascade reaction                      | Dodecane      | Room temperature, room pressure           | Enzymes                                     | O <sub>2</sub>   | Internal hydrogen-borrowing cycle                          | All substrate atoms enter the product      | 100% Terminal selectivity          |      |
| <b>Chemical synthesis</b>     | Butadiene Trimerization Route                      | 1,3-Butadiene | High temperature (>100 °C), high pressure | Precious metals (Pd, V, TiCl <sub>4</sub> ) | HNO <sub>3</sub> | Consuming stoichio-metric ratio of oxidant                 | Produces large amounts of N <sub>2</sub> O | Producing short -chain heteroacids | 5    |
| <b>Microbial fermentation</b> | Fermentation by engineered <i>C. viswanathii</i>   | Dodecane      | 30 °C, room pressure                      | Cells                                       | O <sub>2</sub>   | Exogenous Glucose (NAD(P)H regeneration & Growth)          | Fatty acid catabolism via β-oxidation      | Few by-products                    | 6    |
| <b>Microbial fermentation</b> | Fermentation by engineered <i>Y. lipolytica</i>    | Dodecane      | 28 °C, room pressure                      | Cells                                       | O <sub>2</sub>   | Exogenous Glucose (NAD(P)H regeneration & Growth)          | Intermediate accumulation                  | Few by-products                    | 7    |
| <b>Microbial fermentation</b> | Fermentation by <i>C. viswanathii</i> <i>ipe-1</i> | Dodecane      | 30 °C, room pressure                      | Cells                                       | O <sub>2</sub>   | Exogenous Glucose & xylose (NAD(P)H regeneration & Growth) | Fatty acid catabolism via β-oxidation      | Few by-products                    | 8    |

### DNA sequences and amino acid sequences of enzymes used in this stud

The AlkB gene, derived from *Pseudomonas putida* GPO1, has been codon-optimized for expression in *E. coli*. The gene sequence contains a 6×His tag, and the start and stop codons are indicated by lowercase letters and underscores.

atgCTTGAGAAACACAGAGTTCTGGATTCCGCTCCAGAGTACGTAGATAAAAAGAAATATCTCTGGATACTATCAACTTTGTG  
GCCGGCTACTCCGATGATCGGAATCTGGCTTGCAAATGAAACTGGTTGGGGGATTTTTATGGGCTGGTATTGCTCGTATGG  
TACGGCGCACTTCCATTGCTTGATGCGATGTTTGGTGAGGACTTTAATAATCCGCTGAAGAAGTGGTGCCGAACTAGAGA  
AGGAGCGGTACTATCGAGTTTTGACATATCTAACAGTTCCTATGCATTACGCTGCATTAATTGTGTCAGCATGGTGGGTGCGGA  
ACTCAGCCAATGTCTTGGCTTGAAATGGTGCGCTTGCCTTGTCACTGGGTATCGTGAACGGACTAGCGCTCAATACAGGAC  
ACGAACTCGGTACAAGAAGGAGACTTTTGATCGTTGGATGGCCAAAATTGTGTTGGCTGTCGTAGGGTACGGTCACTTCTT  
TATTGAGCATAATAAGGGTCATCACCGTATGTCGCTACACCGATGGATCCTGCAACATCCCGGATGGGAGAAAGCATTAT  
AAGTTTTCAATCCGTGAGATCCAGGAGCATTATTCTGTGCTTGGGGCTTGAGGAACAACGCCTTTCGCGCCGTGGCCAAA  
GCGTTTGGAGTTTCGATAATGAAATCTCCAACCAATGATCATCACAGTTATTCTTTACGCCGTTCTCCTTGCCTTGTGGAC  
CTAAGATGCTGGTGTCTGCGGATTCAAATGGCTTTCGTTGGTGGCAGCTGACCAGTGCGAACTATATTGAACATTACGG  
CTTGCTCCGTCAAAAAATGGAGGACGGTTCGATATGAGCATCAAAAGCCGCACCATTCTTGAATAGTAATCACATCGTCTCT  
AATCTAGTGCTGTTCCACCTTCAGCGGCACTCGGATCACACGCGCATCCAACACGTTCTTATCAGTCACTTCGGGATTTTCCC  
GGCCTGCCGGCTCTCCGACGGGTACCCTGGTGCATTTTTGATGGCGATGATTCCTCAGTGGTTTAGATCAGTTATGGATCC  
CAAGGTAGTAGATTGGGCTGGTGGTGACCTTAATAAGATCCAAATTGATGATTCGATGCGAGAAACCTATTTGAAAAAATT  
GGCACTAGTAGTGCTGGTCATAGTTCGAGTACCTCTGCGGTAGCATCGCACCACCACCACCACCtag

MLEKHRVLDSAPEYVDKKYLWILSTLWPATPMIGIWLANETGWGIFYGLVLLVWYGALPLLDAMFGEDFNNPPEEVVPKLEKER  
YYRVLTYLTPMHYAALIVSAWWVGTQPMWLEIGALALSLGIVNGLALNTGHELGHKKETFDRWMAKIVLAVVGYGHFFIEHN  
KGHHRDVATPMDPATSRMGESYKFSIREIPGAFIRAWGLEEQRLSRRGQSVWSFDNEILQPMIITVILYAVLLALFGPKMLVFLPI  
QMAFGWWQLTSANYIEHYGLLRQKMEDGRYEHQKPHHSWNSNHIVSNLVLFLHQRHSDHHAHPTRSYQSLRDFPLPALPTG  
YPGAFLMAMIPQWFRSVMDPKVVDWAGGDLNKIQIDDSMRETYLKKFGTSSAGHSSSTSAVASHHHHHH

The AlkG gene, derived from *Pseudomonas putida* GPO1, has been codon-optimized for expression in *E. coli*. The gene sequence has a 6×His tag, and the start and stop codons are marked with lowercase letters and underscores.

atgGCGAGCTACAAATGCCCGGATTGCAACTATGTTTATGACGAGAGCGCGGTAATGTTACGAAGTTTCAGCCCGGGCA  
CCCCGTGGCACCTGATCCCGGAAGACTGGTGCTGCCCGATTGCGCGGTGCGTGACAAGCTGGATTCATGCTGATTGAGA  
GCGGTGTGGGCGAAAAAGGTGTTACCAGCACCCACACCAGCCGAACCTGAGCGAGGTGAGCGGCACCAGCCTGACCGCG  
GAAGCGGTGGTTGCGCCGACCAGCCTGGAGAAGCTGCCGAGCGCGGACGTTAAGGGTCAGGATCTGTACAAAACCAACC  
GCCGCGTAGCGATGCGCAGGGTGGCAAGGCGTACCTGAAATGGATCTGCATTACCTGCGGTCACATCTATGACGAAGCGCT  
GGGCGATGAGGCGGAAGTTTCACCCCGGCACCCGTTTTGAGGACATTCCGGATGACTGGTGCTGCCCGGACTGCGGTGC  
GACCAAAGAAGATTATGTGCTGTATGAAGAGAAGCTCGAGCACCACCACCACCACCtaa

MASYKPCDCNYVYDESAGNVHEGFSPGTPWHLIPEDWCCPDCAVRDKLDFMLIESGVGEKGVSTHTSPNLSEVSGTSLTAEAV  
VAPTSLEKLPSADVKGQDLYKTQPPRSDAQGGKAYLKWICITCGHIYDEALGDEAEGFTPGRFEDIPDDWCCPDCGATKEDYVLY  
EEKLEHHHHHH

The PdR gene, derived from *Pseudomonas putida*, has been codon-optimized for expression in *E. coli*. The gene sequence contains a 6×His tag, and the start and stop codons are indicated by lowercase letters and underscores.

atgAACGCAAACGACAACGTGGTCATCGTCGGTACCGGACTGGCTGGCGTTGAGGTCGCCTTCGGCCTGCGGCCAGCGGCT  
GGGAAGGCAATATCCGGTTGGTGGGGATGCGACGGTAATCCCCATCACCTACCACCGCTATCAAAGCTTACTTGGCCGG  
CAAAGCCACAGCGGAAAGCCTGTACCTGAGAACCCAGATGCCTATGCAGCGCAGAACATCCAATACTCGGAGGCACACA  
GGTAACGGCTATCAACCGCGACCGACAGCAAGTAATCTATCGGATGGCCGGGCACTGGATTACGACCGGCTGGTATTGGC  
TACCGGAGGGCGTCCAAGACCCCTACCGGTGGCCAGTGGCGCAGTTGAAAGGCGAACTTTGATACCTGCGCACACT  
CGAGGACGCCGAGTGCATTCGCCGGCAGCTGATTGCGGATAACCGTCTGGTGGTATTGGTGGCGGCTACATTGGCCTTGA  
AGTGGCTGCCACCGCCATCAAGGCGAACATGCACGTCACCCTGCTTGATACGGCAGCCCGGGTCTGGAGCGGGTTACCGC  
CCGCCCGGTATCGGCCTTTTACGAGCACCTACCCGCGAAGCCGGCGTTGACATACGAACCGGCACGCAGGTGTGCGGGTT  
CGAGATGTCGACCGACCAACAGAAGGTTACCGCCGCTCTGCGAGGACGGCACAAGGCTGCCAGCGGATCTGGTAATCGC  
CGGGATTGGCCTGATACCAAAGTTCGCGAGTTGGCCAGTGGCCGGCCTGCAGGTTGATAACGGCATCGTGATCAACGAACA  
CATGCAGACCTCTGATCCCTTGATCATGGCCGTCGGCGACTGTGCCGATTTACAGTCAGCTCTATGACCGCTGGGTGCGTA  
TCGAATCGGTGCCAATGCCTTGGAGCAGGCACGAAAGATCGCCGCCATCCTCTGTGGCAAGGTGCCACGCGATGAGGCGG  
CGCCCTGGTTCTGGTCCGATCAGTATGAGATCGGATTGAAGATGGTTCGGACTGTCCGAAGGGTACGACCGGATCATTGTCC  
GCGGCTCTTTGGCGCAACCCGACTTCAGCGTTTTCTACCTGCAGGGAGACCGGGTATTGGCGGTCGATACAGTGAACCGTCC  
AGTGGAGTTCAACCGTCAAACAATAATCACGGATCGTTTCCCGGTTGAACCAAACCTACTCGGTGACGAAAGCGTGCCG  
TTAAAGGAAATCATCGCCGCCGCAAAGCTGAACTGAGTAGTGCCACCACCACCACCACCActaa

MNANDNVVIVGTGLAGVEVAFGLRASGWEGNIRLVGDATVIPHLLPLSKAYLAGKATAESLYLRTPDAYAAQNIQLLGGTQVTA  
INRDRQQVILSDGRALDYDRLVLATGGRPRPLPVASGAVGKANNFRYLRTLEDAECIRRLIADNRLVIGGGYIGLEVAATAIKAN  
MHVTLTDAARVLERVTAPPVSIFYEHLHREAGVDIRTGTQVCGFEMSTDQQKVTAVLCEGTRLPADLVIAGIGLIPNCELASAA  
GLQVDNGIVINEHMQTS DPLIMAVGDCARFHSQLYDRWVRIESVPNALEQARKIAAILCGKVPRDEAAPWFWSQYEIGLKMV  
GLSEGYDRIIVRGS LAQPDFS VFY LQGDRVLAVDTVNRPV EFNQSKQIITDRLPVEPNLLGDES VPLKEIIAAKAELSS AHHHHHH

The EcALDH gene, derived from *Escherichia coli* K-12, has been codon-optimized for *E. coli* expression. The gene sequence contains a 6×His tag, and the start and stop codons are indicated by lowercase letters and underscores.

atgAATTTTCATCATCTGGCTTACTGGCAGGATAAAGCGTTAAGTCTCGCCATTGAAAACCGCTTATTTATTAACGGTGAATAT  
ACTGCTGCGGCGGAAAATGAAACCTTTGAAACCGTTGATCCGGTCACCCAGGCACCGCTGGCGAAAATTGCCGCGGCAAG  
AGCGTCGATATCGACCGTGCATGAGCGCAGCACGCGGCGTATTTGAACGCGGCGACTGGTCACTCTCTTCTCCGGCTAAAC  
GTAAAGCGGTACTGAATAAACTCGCCGATTTAATGGAAGCCACGCCGAAGAGCTGGCACTGCTGAAAACCTCTGACACCG  
GCAAACCGATTCTGTCACAGTCTGCGTGATGATATTCGCGGCGGCGCGGCCATTGCTGGTACGCCGAAGCGATCGACA  
AAGTGATGGCGAAGTGGCGACCACAGTAGCCATGAGCTGGCGATGATCGTGCCTGAACCGTGGCGTGATTGCCGCCA  
TCGTGCCGTGGAACCTCCCGCTGTTGCTGACTTCTGAAAACCTCGGCCCGGCGCTGGCGGCGGGAACAGCGTGATTCTAA  
AACCGTCTGAAAAATCACCGCTCAGTGCATTCTGCTCGCGGGGCTGGCGAAAAGAAGCAGGCTTGCCGGATGGTGTGTTGA  
ACGTGGTGACGGGTTTTGGTTCATGAAGCCGGGCGAGGCGCTGTCGCGTCATAACGATATCGACGCCATTGCCTTTACCGGTT  
AACCCGTACCGGGAACAGCTGCTGAAAGATGCGGGGCGACAGCAACATGAAACGCGTCTGGCTGGAAGCGGGCGGCAAAA  
GCGCCAACATCGTTTTGCTGACTGCCCGATTTGCAACAGGCGCAAGCGCCACCGCAGCAGGCATTTCTACAACAGGG  
ACAGGTGTGCATCGCCGGAACGCGCCTGTTGCTGGAAGAGAGCATCGCCGATGAATTCTTAGCCCTGTTAAAACAGCAGGC  
GCAAAACTGGCAGCCGGGCCATCCACTTGATCCCGCAACCACCATGGGCACCTTAATCGACTGCGCCCACGCCACTCGGTC  
CATAGCTTTATTCGGGAAGGCGAAAAGCAAAGGGCAACTGTTGTTGGATGGCCGTAACGCCGGGCTGGCTGCCGCCATCGGC  
CCGACCATCTTTGTGGATGTGGACCCGAATGCGTCTTAAGTCGCGAAGAGATTTTCGGTCCGGTGTGGTGGTACGCGTT  
TCACATCAGAAGAACAGGCGCTACAGCTTGCCAACGACAGCCAGTACGGCCTTGGCGGCGCGGTATGGACGCGCGACCTCT  
CCC GCGCGCACCCGATGAGCCGACGCTGAAAGCCGTTCCGTCTTCGTCAATAACTACAACGACGGCGATATGACCGTGCC  
GTTTGGCGGCTATAAGCAGAGCGGCAACGGTTCGCGACAAATCCCTGCATGCCCTTGAAAAATTCCTGAACTGAAAACCATC  
TGGATAAGCCTGGAGGCCACCACCACCACCACCActaa

MNFHHLAYWQDKALSLAIENRLFINGEYTA AENETFETVDPVTQAPLAKIARGKSV DIDRAMSAARGVFERGDWSLSSPAKRKA  
VLNKLADLMEAHAEELALLELDTGKPIRHS LRDDIPGAARAIRWYAE AIDKVYGEVATTSHELAMIVREPVGVIAAIVPWNFPLLL  
TCWKLGPALAAGNSVILKPSEKSPLSAIRLAGLAKEAGLPDGV LNVVTGFGHEAGQALSRHNDIDAI AFTGSTRTGKQLLDAGDS  
NMKRVWLEAGGKSANIVFADCPDLQQAASATAAGIFYNQGVCIAGTR LLLLEESIADEF LALLKQQAQNWQPGHPLDPATTMG  
TLIDCAHADSVHSFIREGESKGQLLLDGRNAGLAAAIGPTIFVDVDPNASLSREEIFGPVLV VTRFTSEEQALQLANDS QYGLGAAV  
WTRDLSRAHRMSRRLKAGSVFVNNYNDGDMTPFGGYKQSGNGRDKSLH ALEKFTELKTIWISLEAHHHHHH

The CYP153A<sub>Maq</sub> gene, derived from *Marinobacter aquaeole*, has been codon-optimized for expression in *E. coli*.

The gene sequence contains a 6×His tag, and the start and stop codons are indicated by lowercase letters and underscores.

atgCCA ACTCTACCCAGGACATTTGATGACATCCAGAGCCGCTTGATTAACGCAACCAGCCGTGTGGTCCGATGCAGCGCCA  
AATCAAGGGTTGAAGTCTTGATGAGCGCGAAGCGCAAAACCTTTGGTCCGCGCCGTCCGATGCCGGAGTTCGTGGAGAC  
GCCGATCCCGGATGTGAATACCTTAGCGCTGGAGGATATTGATGTGTCTAACCCGTTCTGTATCGCCAGGGCCAATGGCGT  
GCGTACTTCAAACGCTTGAGAGACGAAGCACCGGTTCACTATCAGAAAACTCTCCGTTTGGTCCGTTTTGGTCCGTTACGCG  
TTTCGAGGACATCCTGTTCTGTCGATAAGAGCCATGATTTGTTTTAGGTTGACCCGCTGAGG  
GTCTTTCCCTGGAAATGTTTATCGCCATGGATCCACCGAAGCACGACGTTCAACGTAGCAGCGTCCAGGGTGTGGTGGCGCC  
AAAGAACCTGAAGGAGATGGAAGGTCTAATCCGTTCCCGGACCGGCGACGTCCTGGACAGCTTACCGACTGATAAACCGTT  
TAACTGGGTTCCGGCTGTGTCAAAGAAGTACGCGGCCGTATGCTGGCGACCCTGCTGGATTTCCGTACGAAGAGCGTAC  
AAATTAGTAGAATGGTCGGATCGCATGGCAGGCGCAGCGAGCGGACTGGTGGTGGTTCGCGGACGAAAACGCCATGTT  
TGACGACGCGCGGATATGGCGCGTAGCTTCAGCCGTCTGTGGCGTGACAAAGAGGCACGTCGTGCTGCGGGTGAAGAAC  
CGGGTTTTGACCTGATCAGCCTGCTGCAGAGCAACAAAGAAACCAAGGACCTGATAAATCGGCCTATGGAATTCATCGGCAA  
CCTGACCTTGCTGATCGTTGGTGGCAATGATACCACCCGTA ACTCTATGTCCGGTGGTCTGGTGGCCATGAATGAATCCCGC  
GTGAATTCGAAAACTCAAGGCTAAGCCAGAGCTCATCCCGAATATGGTTAGCGAAATTATCCGTTGGCAGACCCCGCTGGC  
GTACATGAGACGTATTGCCAAACAAGATGTGGAGCTGGGCGGACAAACCATCAAAAAAGGCGACCGCGTGGTGTATGTGGT  
ATGCTAGCGGTAACCGCGATGAGCGCAAGTTCGACAATCCGGACCAGTTTATTATCGATCGTAAGGACGCTCGTAACCACAT  
GTCGTTCCGGTACGGTGTGCATCGTTGCATGGGCAACCCGCTTGCTGAGCTGCAACTCCGTATTCTGTGGGAGGAGATCTTG  
AAGCGCTTTGATAATATTGAAGTTGTTGAGGAGCCGGAGCGCGTCCAGTCGAACTTTGTTCTGGCTACAGCCGTCTGATGG  
TTAAGTTGACGCCGAATCCCTCGAGCACCACCACCACCACCActg

MPTLPRTFDDIQSRLINATSRVPMQRQIQGLKFLMSAKRKTGPRRPMPEFVETPIPDVNTLALEDIDVSNPFLYRQQQWRAYF  
KRLRDEAPVHYQKNSPFGPFWSVTRFEDILFVDKSHDLFSAEPRILGDPPEGLSLEMFIAMDPPKHDVQRSSVQGVVAPKNLKEM  
EGLIRSRTGDVLDLPTDKPFNWVPAVSKELTGRMLATLLDFPYEERHKLVEWSDRMAGAASATGGEFADENAMFDDAADMAR  
SFSRLWRDKEARRAAGEEPGFDLISLLQSNKETKDILNRPMEFIGNLTLIVGGNDTTRNSMSGGLVAMNEFPREFEKLKAKPELIP  
NMVSEIIRWQTPLAYMRRIAKQDVELGGQTIKKGDRVVMWYASGNRDERKFDNPDQFIIDRKDARNHMSFGYGVHRCMGNRL  
AELQLRILWEEILKRFDNIEVVEEPERVQSNFVRGYSRLMVKLTTPNSLEHHHHHH

The Pdx gene, derived from *Pseudomonas putida*, has been codon-optimized for expression in *E. coli*. The gene sequence contains a 6×His tag, and the start and stop codons are indicated by lowercase letters and underscores.

atgAGTAAAGTAGTCTATGTTTCACACGATGGTACTCGTCGCGAGCTGGACGTAGCCGATGGCGTGAGCCTGATGCAAGCGG  
CGGTCTCCAACGGCATCTACGACATCGTGGGTGACTGTGGTGGTTCTGCGAGCTGCGCTACGTGCCACGTGTATGTTAACGA  
GGCGTTCACCGATAAAGTCCGGCAGCTAATGAGCGCGAGATCGGCATGCTGGAATGCGTCACCGCAGAACTTAAGCCGAA  
CAGCCGTCTGTGTGCCAGATTATTATGACCCCGAATTGGACGGCATTGTTGTTGATGTGCCAGATCGTCAGTGGCTCGAG  
CACCACCACCACCACtga

MSKVYVSHDGRRELDVADGVSLMQAAVSNGIYDIVGDCGGSASCATCHVYVNEAFTDKVPAANEREIGMLECVTAELKPNRS  
LCCQIIMTPELDGIVVDVPDRQWLEHHHHHH

The AcCO<sub>6</sub> gene, derived from *Arthrobacter cholorphenolicus*, has been codon-optimized for the *E. coli* expression system. The gene sequence contains a 9×His tag, and the start and stop codons are indicated by lowercase letters and underscores.

atgGGCAGCAGCCATCATCATCATCATCATCACAGCAGCGGCCTGGTGCCGCGCGGCAGCCATATTGATAACATTGA  
AAACCTGAGCGATCGCGGCTTTGATTATGTGGTGATTGGCGGCGCAGCGGGGCGGGCGGTGGCGGCGCCTGAGCG  
AAGATCCGGATGTGAGCGTGGCGCTGGTGAAGCGGGCCCGATGATCGCAACATCCGGAAATTCTGCAGCTGGATCGCT  
GGATGAACTGCTGGAAAGCGGCTATGATTGGGATTATCCGATTGAACCGCAGGAAAACGGCAACAGCTTTATGCGCCATG  
CGCGCGGAAAGTATGGGCGGCTGCAGCAGCCATAACGCGTGCAATTGCGTTTTGGGCGCCGCGAAGATCTGGATGAA  
TGGGAAAGCAAATATGGCGGACCGGCTGGAACGCGGCGAACGCGTGCCGCTGTATAAACGCCTGGAAACCAACCAGGA  
TGCGGGCCCGGATGCGCCGCATCATGGCGATAGCGGCCCGGTGCATCTGATGAACGTGCCGCCGGCGGATCCGAGCGGCG  
TGGCGCTGCTGGATGCGTGCAAGAAGCGGGCATTCCGCGCGCGCTTTAACCCGGCACCACCGTGGTGAACGGCGCG  
AACTTTTTTCAGATTAACCGCGCGGCGATGGCACCCGAGCAGCAGCAGCGTGAGCTATATTCATCCGATTATTGAACGCG  
ATAACTTTACCTGCTGACCGGCTGCGCGCGGCCAGCTGGTGTGGATGCGGATAAACGCTGCACCGGCGTGGAAGTGG  
TGGGCGGCGCGCGGCCACCCATCGCTGACCGCGGCCATGAAGTATTCTGAGCACCGGCGCGATTGATAGCCCGA  
AACTGCTGATGCTGAGCGCATTGGCCCGGCGAACATCTGGCGCAGCATGGCATTGAAGTCTGGTGGATAGCCCGGGC  
GTGGGCGAAAACCTGCAGGATCATCCGGAAGGCGTGGTGCAGTTGAAGCGAAACAGCCGATGGTGCAGACCAGCACCCA  
GTGGTGGGAAATTGGCATTTTTACCCGACCGAAGATGGCCTGGATCGCCCGGATCTGATGATGCATTATGGCAGCACCCCG  
CGGATCGCAACACCCTGCGCCATGGCTATCCGACCACCGAAAACGGCTTTAGCCTGACCCCGAACGTGACCCATGCGCGCA  
GCCGCGGACCGTGCCTGCGCAGCCGCGATTTTCGCGATAAACCGATGGTGGATCCGCGCTATTTTACCGATCCGGAAG  
GCCATGATGCGCGTATGGTGGCGGGCATTGCGAAAGCGCGGAAATTGCGGCGCAGCCGGCGATGAGCGCGTGGACC  
GGCCGGAACCTGAGCCCGGCGTGGGCGCGCAGACCGATGAAGAAGTGCAGGATTATATTCGAAAACCCATAACACCGTG  
TATCATCCGGTGGCACCGTGCATGGGCGCGGATGATGATGGCATGAGCCCGCTGGATGCGCGCCTGCGCGTGAAGG  
CGTGACCGGCTGCGCGTGGCGGATGCGAGCGTATGCCGGAACATGTGACCGTGAACCCGAACATTACCGTATGATGAT  
TGGCGAACGCTGCGCGGATCTGATTAAGCGGATTATGCGGGCGCGGATGCGCTGGAAGAAAAGAACTGACCACCAGCT  
TTGCGtaa

MGSSHHHHHHHHSSGLVPRGSHIDNIENLSDRGFDYVVIGGGSAGAAVAARLSEDPDVSVALVEAGPDDRNIPILQLDRWM  
ELLESGYDWDYPIEPQENGSFMRHARAKVMGGCSSHNACIAFWAPREDLEWESKYGATGWNAANAWPLYKRLETNQDAG  
PDAPHHGDSGPVHLMNVPPADPSGVALLDACEEAGIPRARFNTGTTVVNGANFFQINRRGDGTRSSSSVSIHPIIERDNFTLLTG

LRARQLVFDADKRCTGVEVGGARGRTHRLTARHEVILSTGAIDSPKLLMLSGIGPAEHLAQHGIEVLVDSPGVGENLQDHPEGV  
VQFEAKQPMVQTSTQWWEIGIFPTEDGLDRPDLMMHYGSTPRDRNTRLRHGYPTTENGFSLTPNVTHARSRGTVRLRSRDFRD  
KPMVDPRYFTDPEGHDMRVMVAGIRKAREIAAQPAMSAWTGRELSPGVGAQTDEELQDYIRKTHNTVYHPVGTVRMGADDD  
GMSPLDARLRVKGVTGLRVADASVMPEHVTV NPNITVMMIGERCADLIKADYAGADALEEKELTTSFA

The CatA gene, derived from *Bacillus subtilis*, has been codon-optimized for the *E. coli* expression system. The gene sequence contains a 9×His tag, and the start and stop codons are indicated by lowercase letters and underscores.

atgAGCAGCAATAAACTGACCACCAGCTGGGGTGCGCCGGTTGGCGATAATCAAATAGCATGACCGCGGTAGCCGTGGC  
CCGACCCTGATTACAGACGTGCACCTGCTGGAAAAGCTGGCGCACTTCAACCGTGAGCGTGTCCGGAACGTGTTGTTTCATG  
CGAAGGGTGCGGGTGCGCACGGCTATTTGAGGTGACCAACGATGTTACCAAGTACACCAAAGCGGCGTTTCTGAGCGAAG  
TGGGCAAGCGTACCCCGCTGTTTCATCCGTTTTAGCACCGTTGCGGGTGAGCTGGGTAGCGCGGACACCGTGCCTGATCCGC  
GTGGCTTCGCGGTTAAGTTTTATACCGAGGAAGGCAACTACGACATCGTGGTAACAACACCCCGTTTTCTTTATCCGTGAC  
GCGATTAAATTCGGGATTTTATTCACACCCAGAAGCGTGACCCGAAAACCCACCTGAAGAACCCGACCGCGGTGTGGGATT  
TTTGAGCCTGAGCCCGGAGAGCCTGCACCAAGTTACCATCCTGATGAGCGACCGTGGTATTCCGGCGACCTGCGTCACAT  
GCACGGCTTCGGTAGCCACACCTTAAGTGGACCAACCGGAGCCGGAAGGCGTGTGGATCAAATATCACTTCAAGACCGA  
ACAGGGTGTGAAGAACCTGGATGTTAACACCGCGGCGAAAATTGCGGGCGAGAACCCGGACTACCACACCGAGGACCTGTT  
CAACGCGATCGAGAACGGTGACTATCCGGCGTGGAACTGTACGTGAGATTATGCCGCTGGAGGATGCGAACACCTATCG  
TTTCGACCCGTTTGATGTGACCAAGGTTTGGAGCCAAAAGACTACCCGCTGATCGAAGTGGGCCGTATGGTTCTGGATCGT  
AACCCGAAAACCTATTTGCGGAAAGTGAACAAGCGACCTTTAGCCCGGGCACCTGGTGCCGGGTATTGACGTTAGCCCG  
GATAAGATGCTGCAGGGCCGCTGTTTCGCGTATCACGACGCGCACCGTTACCGTGTGGGTGCGAACCACCAAGCGCTGCCG  
ATCAACCGTGCAGGTAACAAAGTTAACAACCTACCAGCGTGATGGTCAAATGCGTTTTGACGATAACGGTGCCGGTAGCGTG  
TACTATGAACCGAACAGCTTTGGCGGTCCGAAGGAGAGCCCGAAGACAAACAGGCGGCGTATCCGGTGAAGGCATTGC  
GGATAGCGTTAGCTACGACCACTATGATCACTACACCCAGGCGGGTGACCTGTACCGTCTGATGAGCGAGGATGAACGTAC  
CCGTCTGGTGGAAAACATCGTTAACGCGATGAAACCGGTTGAGAAAGAGGAGATCAAACCTGCGTCAAATGAACACTTCTA  
CAAAGCGGACCCGGAATACGGTAAACGTGTTGCGGAAGGTCTGGGCCTGCCGATTAAGAAGGACAGCCTCGAGCACACC  
ACCACCACCta

MSSNKLTSWGAPVGDNQNSMTAGSRGPTLIQDVHLEKLAHFNRRVPERVVHAKGAGAHGYFEVNDVTKYKAFLSEVG  
KRTPLFIRFSTVAGELGSADTVRDPGRFAVKFYTEEGNYDIVGNNTPVFFIRDAIKFPDFIHTQKRDPKTHLKNPTAVWDFWLSPE  
SLHQVTILMSDRGIPATLRHMHGFGSHTFKWTNAEPEGVWIKYHFKTEQGVKNLDVNTAAKIAGENPDYHTEDLFNAIENGDP  
AWKLYVQIMPLEDANTYRFPDFVTKVWSQKDYPLIEVGRMVLDNRPENYFAEVEQATFSPGTLVPGIDVSPDKMLQGRFAYH  
DAHRYRVGANHQALPINRARNKVNYYQRDGMRFDDNGGGSVYYEPNSFGGPKESPEDKQAAYPVQGIADSVSYDHYDHYT  
QAGDLYRLMSEDERTRLVENIVNAMKPVKEEIKLRQIEHFYKADPEYGKRVAE GLGLPIKDSLEHHHHHH



## References

- 1 Y.-F. Tsai, W.-I. Luo, J.-L. Chang, C.-W. Chang, H.-C. Chuang, R. Ramu, G.-T. Wei, J.-M. Zen and S. S. F. Yu, *Sci. Rep.*, 2017, **7**, 8369.
- 2 Y. M. van Nuland, F. A. de Vogel, E. L. Scott, G. Eggink and R. A. Weusthuis, *Metab. Eng.*, 2017, **44**, 134–142.
- 3 S. Honda Malca, D. Scheps, L. Kühnel, E. Venegas-Venegas, A. Seifert, B. M. Nestl and B. Hauer, *Chem. Commun.*, 2012, **48**, 5115–5117.
- 4 E. Kühnel, D. D. P. Laffan, G. C. Lloyd-Jones, T. Martínez del Campo, I. R. Shepperson and J. L. Slaughter, *Angew. Chem. Int. Ed.*, 2007, **46**, 7075–7078.
- 5 *Eur Pat.*, 2407444A2, 2012.
- 6 N. N. Pham, C.-W. Chang, Y.-H. Chang, Y. Tu, J.-Y. Chou, H.-Y. Wang and Y.-C. Hu, *Metab. Eng.*, 2023, **77**, 76–88.
- 7 S. Lim, H.-w. Yoo, S. Sarak, B.-g. Kim and H. Yun, *J. Ind. Eng. Chem.*, 2021, **98**, 358–365.
- 8 W. Cao, B. Liu, J. Luo, J. Yin and Y. Wan, *Bioresour. Technol.*, 2017, **243**, 179–187.
